# Supplementary material for: Rational design of multimodal and multifunctional InP quantum dot nanoprobes for cancer: in vitro and in vivo applications
Source: Royal Society of Chemistry journal article supplement (doi:10.1039/c3ra23169k), 2013-01-01
Supplement: c3ra23169k.pdf [file c3ra23169k.pdf]

## Electronic Supplementary Information

### Rational design of InP quantum dot based theranostic nanoprobes for cancer: in vitro and in vivo applications

Rui Hu, Yucheng Wang, Xin Liu, Guimiao Lin, Cher Heng Tan, Wing-Cheung Law, Indrajit Roy, and  
5 Ken-Tye Yong\*

\* Corresponding Authors: *kyong@ntu.edu.sg*;

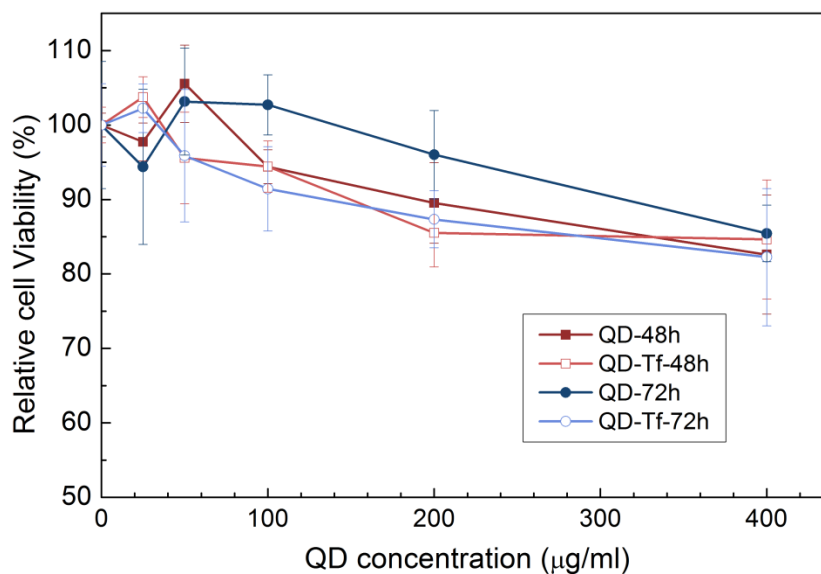

10 Figure S1. Relative cell viability evaluation of Panc-1 cells treated with InP/ZnS QDs conjugated with (QD) or without (QD-Tf) transferrin 48 and 72 hours post treatment.

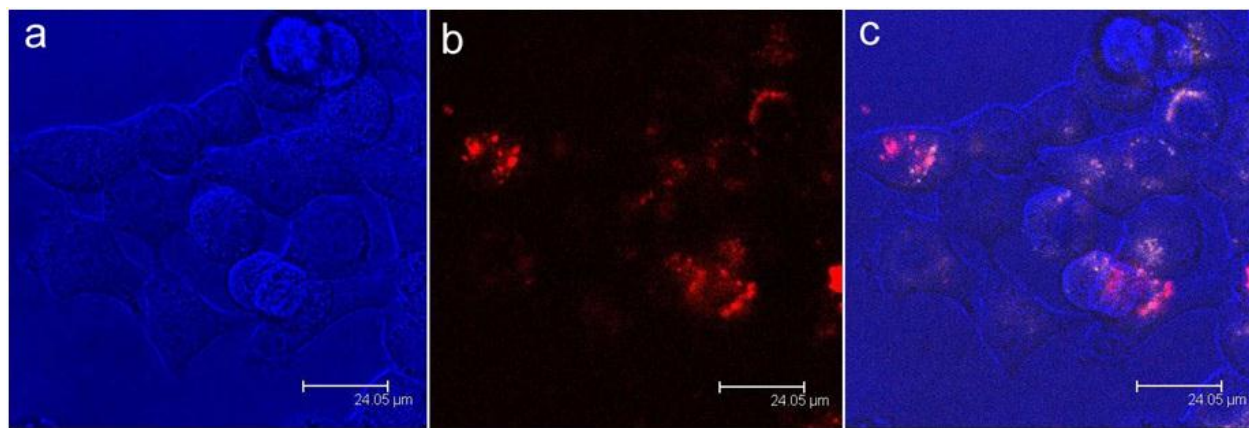

15 Figure S2. Confocal microscopy image of live Panc-1 cells treated with anti-Claudin 4 conjugated InP/ZnS nanoprobes. (a) transmission, (b) fluorescent signal from InP/ZnS QDs and (c) overlay.

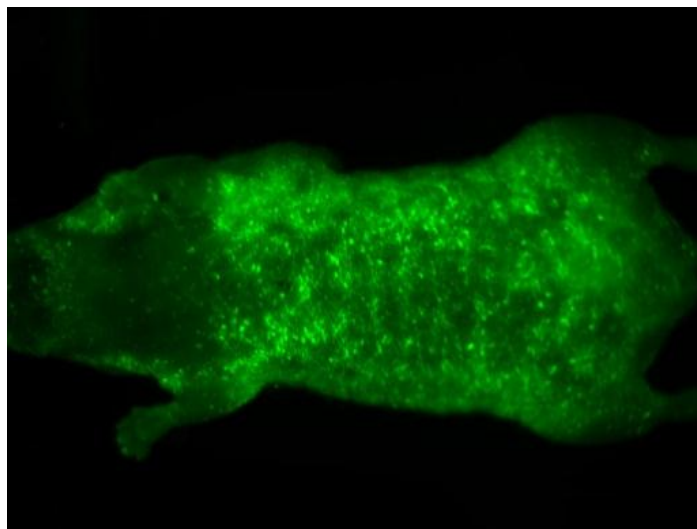

Figure S3. In vivo fluorescent image of InP/ZnS theranostic nanoprobe treated tumor bearing mouse. Since the penetration depth of the blue excitation is rather shallow, fluorescent signals from the InP/ZnS nanoprobes in the organs could hardly be detected.

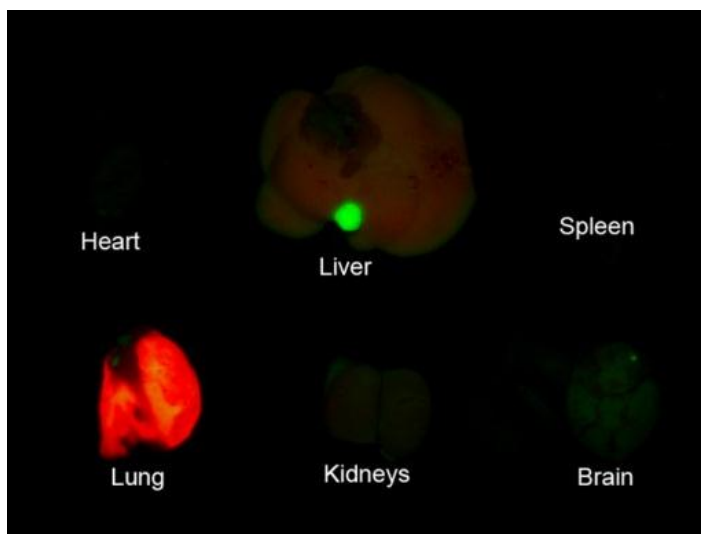

5

Figure S4. Fluorescent image of the major organs dissected, showing the nanoprobes accumulated mainly in the liver and lung after 15 hours of circulation.
